# Supplementary material
Source: MDPI journal article supplement (https://www.mdpi.com/2039-4713/14/1/21)
Supplement: s1 [file s1]

# Mitigation of Salt Stress in Rice by the Halotolerant Plant Growth-Promoting Bacterium *Enterobacter asburiae* D2

Zican Ning <sup>1,2</sup>, Kexin Lin <sup>1</sup>, Mengya Gao <sup>1</sup>, Xiao Han <sup>1</sup>, Qingjie Guan <sup>1,2</sup>, Xiang Ji <sup>3,4</sup>, Shuyu Yu <sup>3,\*</sup> and Lei Lu <sup>1,2,\*</sup>

<sup>1</sup> College of Life Sciences, Northeast Forestry University, Harbin 150040, China; zicanning@163.com (Z.N.); kx\_lin@126.com (K.L.); mengyagao@yeah.net (M.G.); xiaohan093@163.com (X.H.); qingjieguan@126.com (Q.G.)

<sup>2</sup> Key Laboratory of Saline-Alkali Vegetation Ecology Restoration (Northeast Forestry University), Ministry of Education, Harbin 150040, China

<sup>3</sup> College of Water Conservancy and Civil Engineering, Inner Mongolia Agricultural University, Hohhot 010018, China; jixiang@imau.edu.cn

<sup>4</sup> Hetao College, Bayan Nur 015000, China

\* Correspondence: shuyuyu@126.com (S.Y.); llul@nefu.edu.cn (L.L.)

**Table S1.** Plant growth-promoting abilities of bacteria isolated from the rhizosphere of rice.

| Strains | Phosphate solubilization | Siderophore production | ACC deaminase activity |
|---------|--------------------------|------------------------|------------------------|
| D2      | ++                       | +                      | +                      |
| D5      | ++                       | +                      | –                      |
| D6      | –                        | +                      | +                      |
| D8      | –                        | –                      | –                      |
| D11     | +                        | ++                     | –                      |
| D15     | –                        | –                      | +                      |

Note: –, not detected; +, low activity; ++, strong activity.

**Table S2.** Genomic features of *Enterobacter asburiae* D2.

| Features                   | Values    |
|----------------------------|-----------|
| Genome size (bp)           | 4,659,687 |
| G+C content (%)            | 55.73     |
| Protein-coding genes (CDS) | 4327      |
| Gene total length (bp)     | 4,158,297 |
| Average gene length (bp)   | 961.01    |
| Gene/Genome (%)            | 89.24     |
| rRNAs (5s; 16s; 23s)       | 8; 1; 0   |
| tRNAs                      | 74        |
| NR annotation              | 4,316     |
| Swiss-Prot annotation      | 3,896     |
| Pfam annotation            | 4,021     |
| COG annotation             | 3,779     |
| GO annotation              | 3,160     |
| KEGG annotation            | 3,082     |

**Table S3.** Average nucleotide identity (ANI) (%) of *Enterobacter asburiae* D2 and other closely related *Enterobacter* species based on genome alignments.

| Strain                                         | ANI value (%) |
|------------------------------------------------|---------------|
| <i>Enterobacter</i> sp. D2                     |               |
| <i>Enterobacter mori</i> LMG 25706(T)          | 90.05         |
| <i>Enterobacter asburiae</i> CAV1043           | 98.29         |
| <i>Enterobacter cloacae</i> ATCC 23373(T)      | 88.78         |
| <i>Enterobacter hormaechei</i> ATCC 49162(T)   | 87.65         |
| <i>Enterobacter ludwigii</i> EN-119(T)         | 88.39         |
| <i>Enterobacter roggenskampi</i> EN-117(T)     | 93.11         |
| <i>Enterobacter cancerogenus</i> ATCC33241(T)  | 86.79         |
| <i>Enterobacter sichuanensis</i> WCHEC11597(T) | 91.57         |
| <i>Enterobacter kobei</i> DSM 13645(T)         | 90.65         |
| <i>Enterobacter bugandensis</i> EB-247(T)      | 91.47         |

**Table S4.** Genes related to PGP traits and stress response in the genome of *Enterobacter asburiae* D2.

| PGP traits               | Gene              | Gene function                                                                    |
|--------------------------|-------------------|----------------------------------------------------------------------------------|
| IAA production           | <i>trpA</i>       | Tryptophan synthase alpha chain [EC:4.2.1.20]                                    |
|                          | <i>trpB</i>       | Tryptophan synthase beta chain [EC:4.2.1.20]                                     |
|                          | <i>trpCF</i>      | Indole-3-glycerol phosphate synthase [EC:4.1.1.48]                               |
|                          | <i>trpE</i>       | Anthranilate synthase component I [EC:4.1.3.27]                                  |
|                          | <i>trpGD</i>      | Anthranilate synthase [EC:4.1.3.27]                                              |
|                          | <i>trpS</i>       | Tryptophanyl-tRNA synthetase [EC:6.1.1.2]                                        |
|                          | <i>mtr</i>        | Tryptophan permease                                                              |
|                          | <i>aspC</i>       | Aspartate aminotransferase [EC:2.6.1.1]                                          |
|                          | <i>ipdC</i>       | Indole-3-pyruvate decarboxylase [EC:4.1.1.74]                                    |
|                          | <i>aldB</i>       | Aldehyde dehydrogenase [EC:1.2.1.-]                                              |
|                          | <i>ALDH</i>       | Aldehyde dehydrogenase (NAD+) [EC:1.2.1.3]                                       |
| Phosphate solubilization | <i>pstA/C</i>     | Phosphate ABC transporter permease                                               |
|                          | <i>pstB</i>       | Phosphate ABC transporter ATP-binding protein [EC:7.3.2.1]                       |
|                          | <i>pstS</i>       | Phosphate ABC transporter substrate-binding protein                              |
|                          | <i>phoU</i>       | Phosphate transport system protein                                               |
|                          | <i>phnC</i>       | Phosphonate ABC transporter ATP-binding protein [EC:7.3.2.2]                     |
|                          | <i>phnD</i>       | Phosphonate ABC transporter substrate-binding protein                            |
|                          | <i>phnE</i>       | Phosphonate transport system permease protein                                    |
|                          | <i>phnF</i>       | Phosphonate metabolism transcriptional regulator                                 |
|                          | <i>phnG/H/I/L</i> | Alpha-D-ribose 1-methylphosphonate 5-triphosphate synthase subunit [EC:2.7.8.37] |
|                          | <i>phnJ</i>       | Alpha-D-ribose 1-methylphosphonate 5-phosphate C-P lyase [EC:4.7.1.1]            |
|                          | <i>phnK</i>       | Putative phosphonate transport system ATP-binding protein                        |
|                          | <i>phnM</i>       | Alpha-D-ribose 1-methylphosphonate 5-triphosphate diphosphatase [EC:3.6.1.63]    |
|                          | <i>phnN</i>       | Ribose 1,5-bisphosphokinase [EC:2.7.4.23]                                        |
|                          | <i>phnO</i>       | Aminoalkylphosphonate N-acetyltransferase [EC:2.3.1.280]                         |
|                          | <i>phnP</i>       | Phosphoribosyl 1,2-cyclic phosphate phosphodiesterase [EC:3.1.4.55]              |
|                          | <i>gcd</i>        | Quinoprotein glucose dehydrogenase [EC:1.1.5.2]                                  |
|                          | <i>phoA</i>       | Alkaline phosphatase [EC:3.1.3.1]                                                |
|                          | <i>aphA</i>       | Acid phosphatase (class B) [EC:3.1.3.2]                                          |

Table S4. Cont.

| PGP traits                | Gene            | Gene function                                                                                      |
|---------------------------|-----------------|----------------------------------------------------------------------------------------------------|
| Nitrogen fixation         | <i>nifJ</i>     | Pyruvate-ferredoxin oxidoreductase [EC:1.2.7.1]                                                    |
|                           | <i>iscA</i>     | iron-sulfur cluster assembly protein                                                               |
|                           | <i>iscR</i>     | Iron-sulfur cluster assembly transcription factor                                                  |
|                           | <i>iscS</i>     | Cysteine desulfurase [EC:2.8.1.7]                                                                  |
|                           | <i>iscU</i>     | Nitrogen fixation protein NifU and related proteins                                                |
|                           | <i>sufA/B/D</i> | Fe-S cluster assembly protein                                                                      |
|                           | <i>sufC</i>     | Fe-S cluster assembly ATP-binding protein                                                          |
|                           | <i>sufE</i>     | cysteine desulfuration protein                                                                     |
|                           | <i>sufS</i>     | cysteine desulfurase                                                                               |
| ACC deaminase activity    | <i>dcyD</i>     | D-cysteine desulphydrase [EC:4.4.1.15]                                                             |
| Siderophore production    | <i>fepA</i>     | Ferric enterobactin receptor                                                                       |
|                           | <i>fepB</i>     | Ferric enterobactin transport system substrate-binding protein                                     |
|                           | <i>fepC</i>     | Iron-siderophore transport system ATP-binding protein                                              |
|                           | <i>fepD/G</i>   | Iron-siderophore transport system permease protein                                                 |
|                           | <i>afuA</i>     | Iron (III) transport system substrate-binding protein                                              |
|                           | <i>afuB</i>     | Iron (III) transport system permease protein                                                       |
|                           | <i>afuC</i>     | Iron (III) transport system ATP-binding protein [EC:7.2.2.7]                                       |
|                           | <i>fhuB</i>     | Ferric hydroxamate transport system permease protein                                               |
|                           | <i>fhuC</i>     | Ferric hydroxamate transport system ATP-binding protein [EC:7.2.2.16]                              |
|                           | <i>fhuD</i>     | Ferric hydroxamate transport system substrate-binding protein                                      |
|                           | <i>efeB</i>     | Iron uptake transporter deferrochelate [EC:1.11.1.-]                                               |
|                           | <i>efeO</i>     | Iron uptake system component                                                                       |
|                           | <i>efeU</i>     | High-affinity iron transporter                                                                     |
|                           | <i>entA</i>     | 2,3-dihydro-2,3-dihydroxybenzoate dehydrogenase [EC:1.3.1.28]                                      |
|                           | <i>entB</i>     | Bifunctional isochorismate lyase [EC:3.3.2.1]                                                      |
|                           | <i>entC</i>     | Isochorismate synthase [EC:5.4.4.2]                                                                |
|                           | <i>entD</i>     | Enterobactin synthetase component D [EC:6.3.2.14]                                                  |
|                           | <i>entE</i>     | (2,3-dihydroxybenzoyl)adenylate synthase [EC: 6.2.1.71]                                            |
|                           | <i>entF</i>     | Enterobactin non-ribosomal peptide synthetase [EC: 6.2.1.72]                                       |
|                           | <i>entH</i>     | Proofreading thioesterase                                                                          |
|                           | <i>entS</i>     | Enterobactin transporter                                                                           |
|                           | <i>iucA</i>     | N <sup>2</sup> -citryl-N <sup>6</sup> -acetyl-N <sup>6</sup> -hydroxylysine synthase [EC:6.3.2.38] |
|                           | <i>iucB</i>     | Acetyl CoA:N <sup>6</sup> -hydroxylysine acetyl transferase [EC:2.3.1.102]                         |
|                           | <i>iucC</i>     | Aerobactin synthase [EC:6.3.2.39]                                                                  |
|                           | <i>iucD</i>     | Lysine N <sup>6</sup> -hydroxylase [EC:1.14.13.59]                                                 |
| Cytokinin synthesis       | <i>miaA</i>     | tRNA dimethylallyltransferase [EC:2.5.1.75]                                                        |
|                           | <i>miaB</i>     | tRNA-2-methylthio-N <sup>6</sup> -dimethylallyl-adenosine synthase [EC:2.8.4.3]                    |
|                           | <i>miaE</i>     | tRNA-2-(methylsulfanyl)-N <sup>6</sup> -isopentenyladenosine 37 hydroxylase [EC:1.14.99.69]        |
| Glycine-betaine synthesis | <i>betA</i>     | Choline dehydrogenase [EC:1.1.99.1]                                                                |
|                           | <i>betB</i>     | Betaine-aldehyde dehydrogenase [EC:1.2.1.8]                                                        |
|                           | <i>betT</i>     | Choline/glycine/proline betaine transport protein                                                  |

Table S4. Cont.

| PGP traits          | Gene                    | Gene function                                                             |
|---------------------|-------------------------|---------------------------------------------------------------------------|
| Proline synthesis   | <i>proA</i>             | Glutamate-5-semialdehyde dehydrogenase [EC:1.2.1.41]                      |
|                     | <i>proB</i>             | Glutamate 5-kinase [EC:2.7.2.11]                                          |
|                     | <i>proC</i>             | Pyrroline-5-carboxylate reductase [EC:1.5.1.2]                            |
|                     | <i>proP</i>             | MFS transporter, MHS family, proline/betaine transporter                  |
|                     | <i>proS</i>             | Prolyl-tRNA synthetase [EC:6.1.1.15]                                      |
|                     | <i>proV</i>             | Glycine betaine/proline transport system ATP-binding protein [EC:7.6.2.9] |
|                     | <i>proW</i>             | Glycine betaine/proline transport system permease protein                 |
|                     | <i>proX</i>             | Glycine betaine/proline transport system substrate-binding protein        |
|                     | <i>proY</i>             | Proline-specific permease ProY                                            |
| Trehalose synthesis | <i>treB</i>             | Trehalose PTS system EIIBC or EIIBCA component [EC:2.7.1.201]             |
|                     | <i>treS</i>             | Maltose alpha-D-glucosyltransferase [EC:5.4.99.16]                        |
|                     | <i>treY</i>             | (1->4)-alpha-D-glucan 1-alpha-D-glucosylmutase [EC:5.4.99.15]             |
|                     | <i>treZ</i>             | Maltooligosyltrehalose trehalohydrolase [EC:3.2.1.141]                    |
|                     | <i>otsA</i>             | Trehalose 6-phosphate synthase [EC:2.4.1.15 2.4.1.347]                    |
|                     | <i>otsB</i>             | Trehalose 6-phosphate phosphatase [EC:3.1.3.12]                           |
| EPS synthesis       | <i>bcsA</i>             | Cellulose synthase (UDP-forming) [EC:2.4.1.12]                            |
|                     | <i>bcsB/C</i>           | Cellulose synthase operon protein B/C                                     |
|                     | <i>bcsZ</i>             | Endoglucanase [EC:3.2.1.4]                                                |
|                     | <i>wcaA/B/C/E/F/I/L</i> | Colanic acid biosynthesis glycosyltransferase                             |
|                     | <i>wcaD</i>             | Colanic acid polymerase                                                   |
|                     | <i>wcaJ</i>             | Undecaprenyl-phosphate glucose phosphotransferase [EC:2.7.8.31]           |
|                     | <i>wcaK</i>             | Colanic acid biosynthesis pyruvyl transferase                             |
|                     | <i>wcaM</i>             | Colanic acid biosynthesis protein WcaM                                    |
|                     | <i>pgaA</i>             | Poly-beta-1,6 N-acetyl-D-glucosamine export porin PgaA                    |
|                     | <i>pgaB</i>             | Poly-beta-1,6-N-acetyl-D-glucosamine N-deacetylase                        |
|                     | <i>pgaC</i>             | Poly-beta-1,6-N-acetyl-D-glucosamine synthase                             |
|                     | <i>pgaD</i>             | Poly-beta-1,6-N-acetyl-D-glucosamine biosynthesis protein                 |

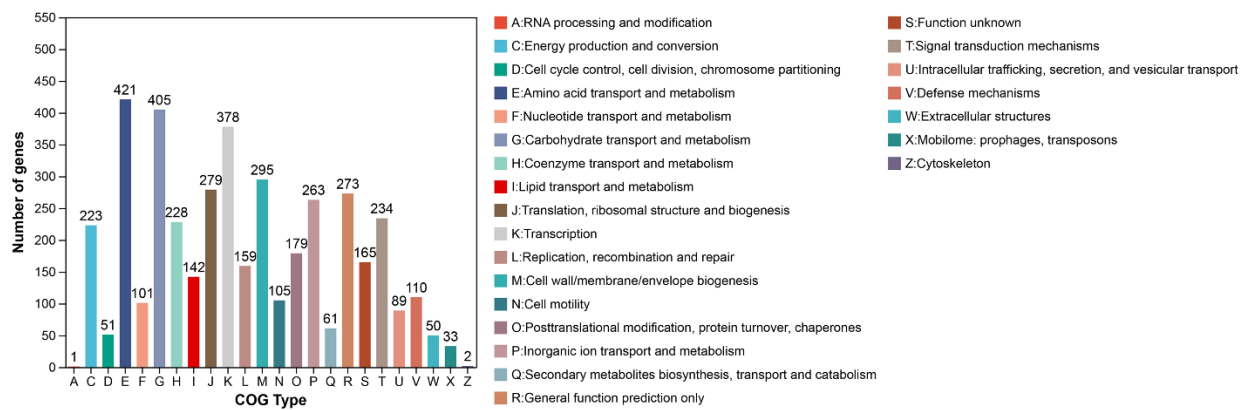

**Figure S1.** Clusters of Orthologous Groups (COGs) function classification of *Enterobacter asburiae* D2 genome.

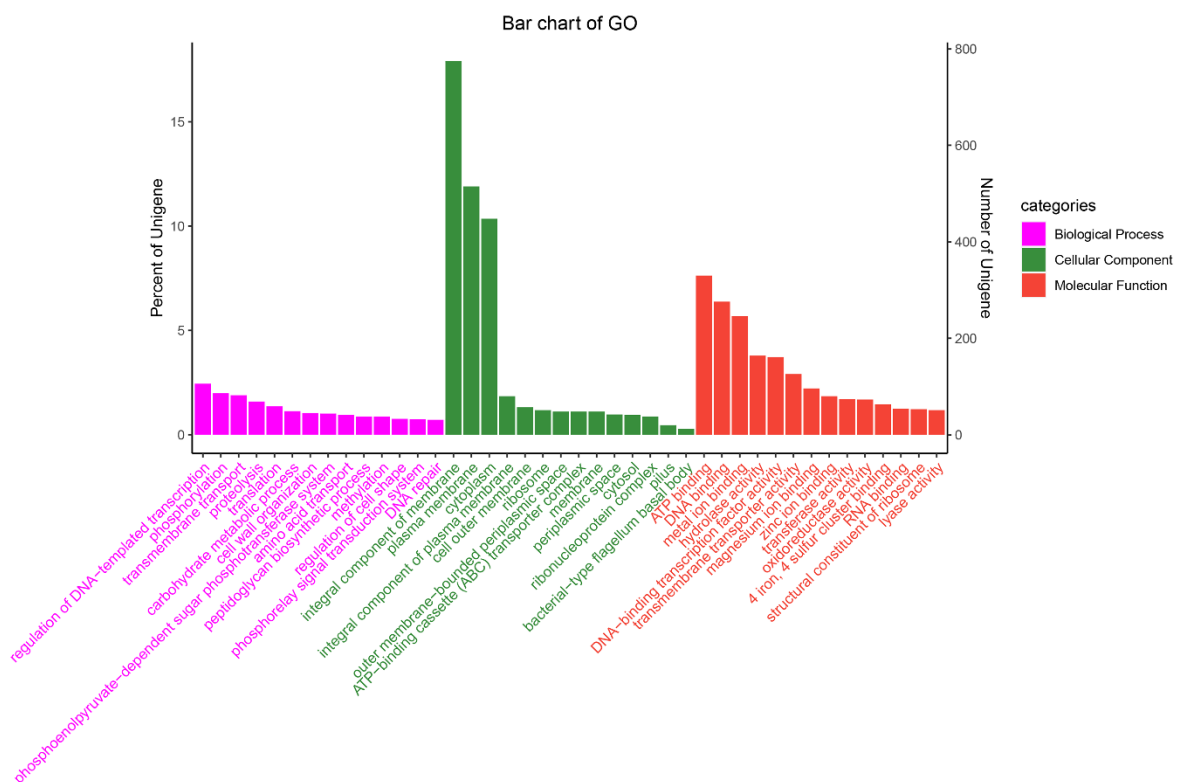

**Figure S2.** Assignment of Gene Ontology (GO) term for predicted genes of *Enterobacter asburiae* D2 genome.

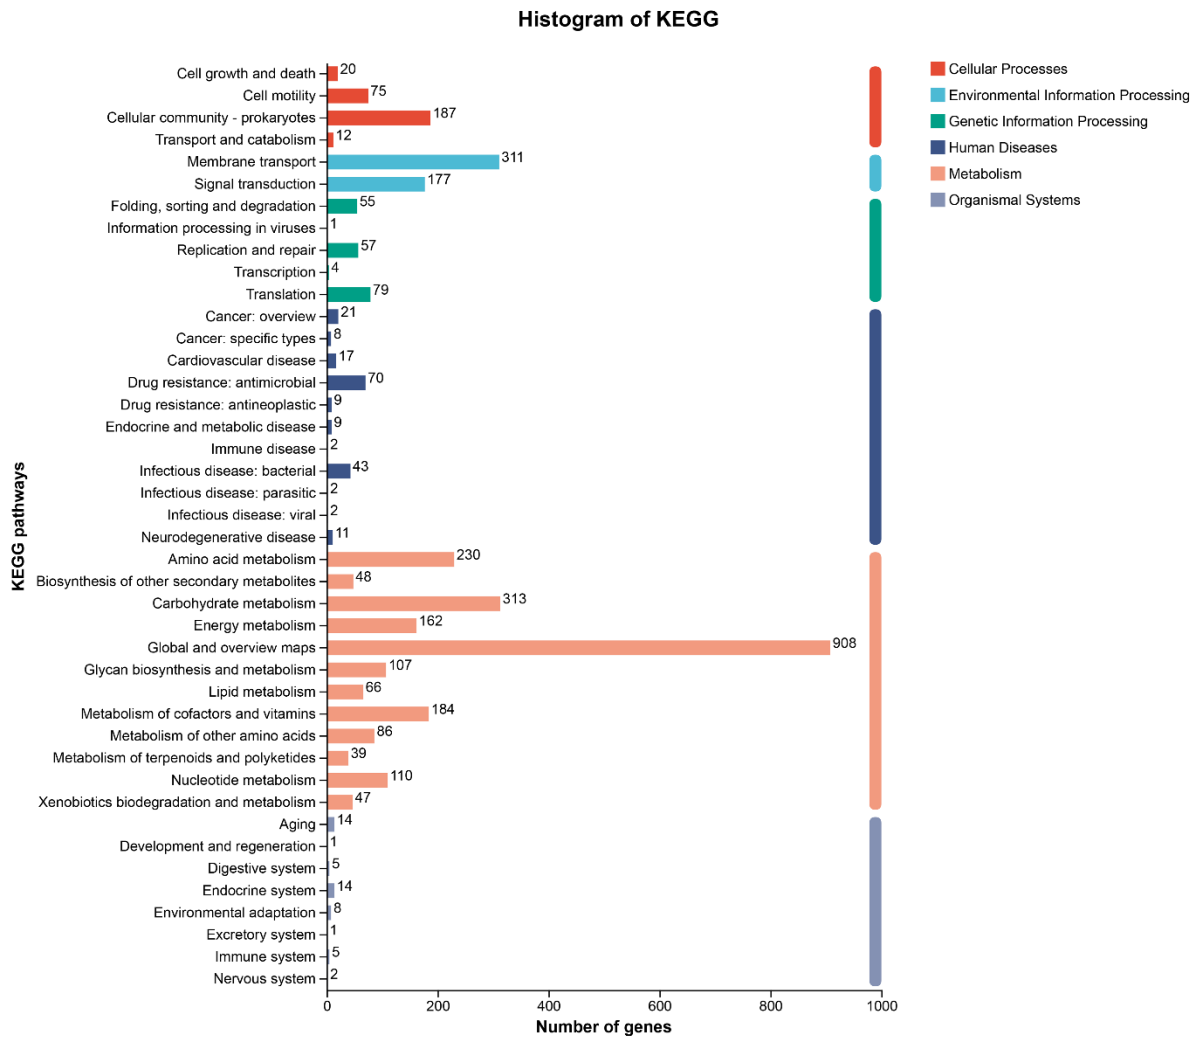

**Figure S3.** Kyoto Encyclopedia of Genes and Genomes (KEGG) annotation of *Enterobacter asburiae* D2 genome.
